# Supplementary material
Source: publisher site journal article supplement (https://www.spandidos-publications.com/8557/downloadSupplementary)
Supplement: Supplementary file 1 [file downloadSupplementary]

Table SV. Heterogeneity test using the invariance weighted method.

| Gene     | Q           | Q_df | Q_P-value   |
|----------|-------------|------|-------------|
| CACNA2D2 | 2.306334356 | 11   | 0.99709757  |
| ADRB1    | 4.911347921 | 3    | 0.178404979 |
| CALCRL   | 1.651071699 | 11   | 0.999394453 |
| PAFAH1B3 | 1.257179677 | 5    | 0.93927556  |
| SEMA6A   | 1.71651647  | 4    | 0.787715245 |
| NDRG4    | 1.251691449 | 3    | 0.740635101 |
| PRX      | 21.61367933 | 14   | 0.086908472 |
| CNFN     | 0.345458324 | 3    | 0.951264036 |
| RASIP1   | 4.269884736 | 2    | 0.118251405 |
| CAV2     | 31.74308518 | 29   | 0.331262742 |
| FOLR3    | 67.01659229 | 56   | 0.148778805 |
| TNNC1    | 0.371810323 | 5    | 0.996070599 |
| TEK      | 8.606662208 | 19   | 0.979457286 |
| FOSB     | 3.660601709 | 4    | 0.453882085 |
| LRRC32   | 2.842725069 | 2    | 0.241384897 |
| ACVRL1   | 1.660643518 | 8    | 0.989708547 |
| IGSF10   | 0.271365646 | 2    | 0.873119522 |
| AGRP     | 0.576390081 | 12   | 0.999999378 |
| LOXHD1   | 7.435045384 | 9    | 0.591921389 |
| DPEP2    | 24.37296201 | 19   | 0.182232787 |
| CA4      | 12.37517558 | 12   | 0.416038438 |
| TMEM88   | 2.790916944 | 6    | 0.834594195 |
| TNXB     | 5.082480647 | 6    | 0.533278782 |
| FRMD3    | 17.89085401 | 22   | 0.712439614 |
| PPP1R14B | 0.261002715 | 2    | 0.877655302 |
| THBD     | 26.10061695 | 23   | 0.296139269 |
| ITLN1    | 7.734870732 | 14   | 0.902676194 |
| KRT79    | 2.013440828 | 4    | 0.733286599 |
| PLAC9    | 19.44044862 | 11   | 0.053631201 |

|       |             |    |             |
|-------|-------------|----|-------------|
| UPK3B | 12.49417202 | 16 | 0.709319444 |
|-------|-------------|----|-------------|

df, degrees of freedom.

Table SVI. Level multivariate test.

| Gene     | Egger_intercept | SE          | P-value     |
|----------|-----------------|-------------|-------------|
| CACNA2D2 | -0.003430314    | 0.026220891 | 0.898509188 |
| ADRB1    | -0.046545432    | 0.045382961 | 0.412916165 |
| CALCRL   | 0.007430228     | 0.01611443  | 0.654598562 |
| PAFAH1B3 | -0.0256069      | 0.046950845 | 0.614467209 |
| SEMA6A   | 0.137725254     | 0.145357506 | 0.413288369 |
| NDRG4    | 0.04986073      | 0.057129208 | 0.474817978 |
| PRX      | -0.008876909    | 0.047704002 | 0.85525185  |
| CNFN     | -0.011018094    | 0.051501987 | 0.850426634 |
| RASIP1   | -0.037487269    | 0.073551733 | 0.699925865 |
| CAV2     | -0.012843413    | 0.007986318 | 0.119015618 |
| FOLR3    | -0.009574396    | 0.013229844 | 0.472318823 |
| TNNC1    | 0.017226882     | 0.042135606 | 0.703596742 |
| TEK      | -0.008094403    | 0.013056024 | 0.543044141 |
| FOSB     | 0.147481196     | 0.110269324 | 0.273430718 |
| LRRC32   | -0.050577158    | 0.030871324 | 0.348878754 |
| ACVRL1   | -0.005894877    | 0.016788016 | 0.735817254 |
| IGSF10   | -0.000518804    | 0.023106198 | 0.985708367 |
| AGRP     | 0.006319676     | 0.077790051 | 0.936710288 |
| LOXHD1   | 0.017627814     | 0.013790056 | 0.236981783 |
| DPEP2    | 0.011083192     | 0.013245576 | 0.413706328 |
| CA4      | -0.017972896    | 0.010208107 | 0.106034927 |
| TMEM88   | 0.006375943     | 0.053905767 | 0.910451097 |
| TNXB     | -0.005904022    | 0.026509432 | 0.832570211 |
| FRMD3    | -0.010223375    | 0.00712695  | 0.166164053 |
| PPP1R14B | -0.033013041    | 0.064678808 | 0.699550517 |
| THBD     | -0.008926826    | 0.014176998 | 0.535395963 |
| ITLN1    | 0.013193141     | 0.010753204 | 0.241615718 |
| KRT79    | -0.003114749    | 0.020320358 | 0.887905678 |
| PLAC9    | 0.005564567     | 0.024712114 | 0.826377496 |
| UPK3B    | -0.010334232    | 0.010664024 | 0.347875206 |

SE, standard error.

Table SVII. Steiger directionality test.

| Gene         | ENSEMBL                    | SNP             | Steiger directionality | Steiger_P-value        |
|--------------|----------------------------|-----------------|------------------------|------------------------|
| CACNA2D<br>2 | eqtl-a-<br>ENSG00000007402 | rs13073141      | TRUE                   | $2.58 \times 10^{-12}$ |
| ADRB1        | eqtl-a-<br>ENSG00000043591 | rs540609        | TRUE                   | $2.33 \times 10^{-27}$ |
| CALCRL       | eqtl-a-<br>ENSG00000064989 | rs13430665      | TRUE                   | $2.86 \times 10^{-70}$ |
| PAFAH1B<br>3 | eqtl-a-<br>ENSG00000079462 | rs75439367      | TRUE                   | $4.74 \times 10^{-16}$ |
| SEMA6A       | eqtl-a-<br>ENSG00000092421 | rs154607        | TRUE                   | $2.73 \times 10^{-13}$ |
| NDRG4        | eqtl-a-<br>ENSG00000103034 | rs67742851      | TRUE                   | $2.48 \times 10^{-30}$ |
| PRX          | eqtl-a-<br>ENSG00000105227 | rs13344213      | TRUE                   | $1.69 \times 10^{-07}$ |
| CNFN         | eqtl-a-<br>ENSG00000105427 | rs75665308      | TRUE                   | $4.39 \times 10^{-10}$ |
| RASIP1       | eqtl-a-<br>ENSG00000105538 | rs4911259       | TRUE                   | $2.93 \times 10^{-06}$ |
| CAV2         | eqtl-a-<br>ENSG00000105971 | rs19327863<br>4 | TRUE                   | $7.40 \times 10^{-10}$ |
| FOLR3        | eqtl-a-<br>ENSG00000110203 | rs7121292       | TRUE                   | $4.97 \times 10^{-23}$ |
| TNNC1        | eqtl-a-<br>ENSG00000114854 | rs34131802      | TRUE                   | $5.21 \times 10^{-09}$ |
| TEK          | eqtl-a-<br>ENSG00000120156 | rs10812363      | TRUE                   | $3.86 \times 10^{-07}$ |
| FOSB         | eqtl-a-<br>ENSG00000125740 | rs17696736      | TRUE                   | $1.72 \times 10^{-06}$ |

|          |                            |                 |      |                         |
|----------|----------------------------|-----------------|------|-------------------------|
| LRRC32   | eqtl-a-<br>ENSG00000137507 | rs7943302       | TRUE | $2.21 \times 10^{-18}$  |
| ACVRL1   | eqtl-a-<br>ENSG00000139567 | rs18337395<br>3 | TRUE | $3.65 \times 10^{-07}$  |
| IGSF10   | eqtl-a-<br>ENSG00000152580 | rs4076581       | TRUE | $6.76 \times 10^{-07}$  |
| AGRP     | eqtl-a-<br>ENSG00000159723 | rs11698814<br>8 | TRUE | $4.89 \times 10^{-18}$  |
| LOXHD1   | eqtl-a-<br>ENSG00000167210 | rs79906843      | TRUE | $5.62 \times 10^{-06}$  |
| DPEP2    | eqtl-a-<br>ENSG00000167261 | rs8056803       | TRUE | $3.22 \times 10^{-16}$  |
| CA4      | eqtl-a-<br>ENSG00000167434 | rs56388170      | TRUE | $1.46 \times 10^{-17}$  |
| TMEM88   | eqtl-a-<br>ENSG00000167874 | rs78180894      | TRUE | $6.66 \times 10^{-07}$  |
| TNXB     | eqtl-a-<br>ENSG00000168477 | rs2269426       | TRUE | $1.07 \times 10^{-104}$ |
| FRMD3    | eqtl-a-<br>ENSG00000172159 | rs329121        | TRUE | $7.83 \times 10^{-06}$  |
| PPP1R14B | eqtl-a-<br>ENSG00000173457 | rs1058735       | TRUE | $1.13 \times 10^{-15}$  |
| THBD     | eqtl-a-<br>ENSG00000178726 | rs14399019<br>9 | TRUE | $5.84 \times 10^{-28}$  |
| ITLN1    | eqtl-a-<br>ENSG00000179914 | rs73660574      | TRUE | $4.88 \times 10^{-17}$  |
| KRT79    | eqtl-a-<br>ENSG00000185640 | rs902771        | TRUE | $1.45 \times 10^{-38}$  |
| PLAC9    | eqtl-a-<br>ENSG00000189129 | rs75714675      | TRUE | $2.04 \times 10^{-06}$  |
| UPK3B    | eqtl-a-<br>ENSG00000243566 | rs10156094      | TRUE | $2.24 \times 10^{-161}$ |

SNP, single nucleotide polymorphism.
